# Supplementary material
Source: publisher site journal article supplement (https://www.spandidos-publications.com/4400/downloadSupplementary)

Figure S1. HA-tagged *Ub* or *NEDD8* interacts with *PP2A*. (A) HA-*Ub* and Flag-*PP2A* were co-transfected into 293T cells for the reciprocal co-immunoprecipitation assay after MG132 treatment (B) HA-*NEDD8* and Flag-*PP2A* were co-transfected into 293T cells for the reciprocal co-immunoprecipitation assay after MG132 treatment. (C) HA-*Ub* (K48 and K63) and Flag-*PP2A* were transfected for the reciprocal co-immunoprecipitation assay after MG132 treatment. These immunoprecipitation assays were performed using an anti-HA antibody. HA-*Ub*, HA-ubiquitin; HA-*NEDD8*, HA-neuronal precursor cell-expressed developmentally down-regulated protein 8; PP2A, protein phosphatase 2A.

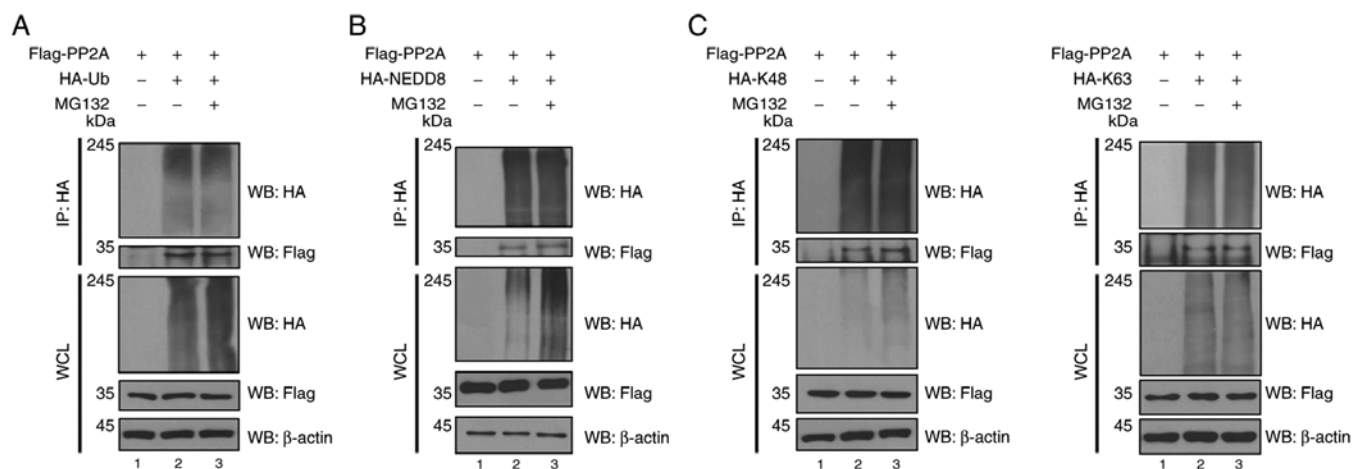

Supplement: Supplementary file 1 [file downloadSupplementary]
